# Supplementary material
Source: PubMed Central journal article supplement (PMC8137542)
Supplement: NIHMS1676600-supplement-1.pdf [file NIHMS1676600-supplement-1.pdf]

# Supplementary Figure 1

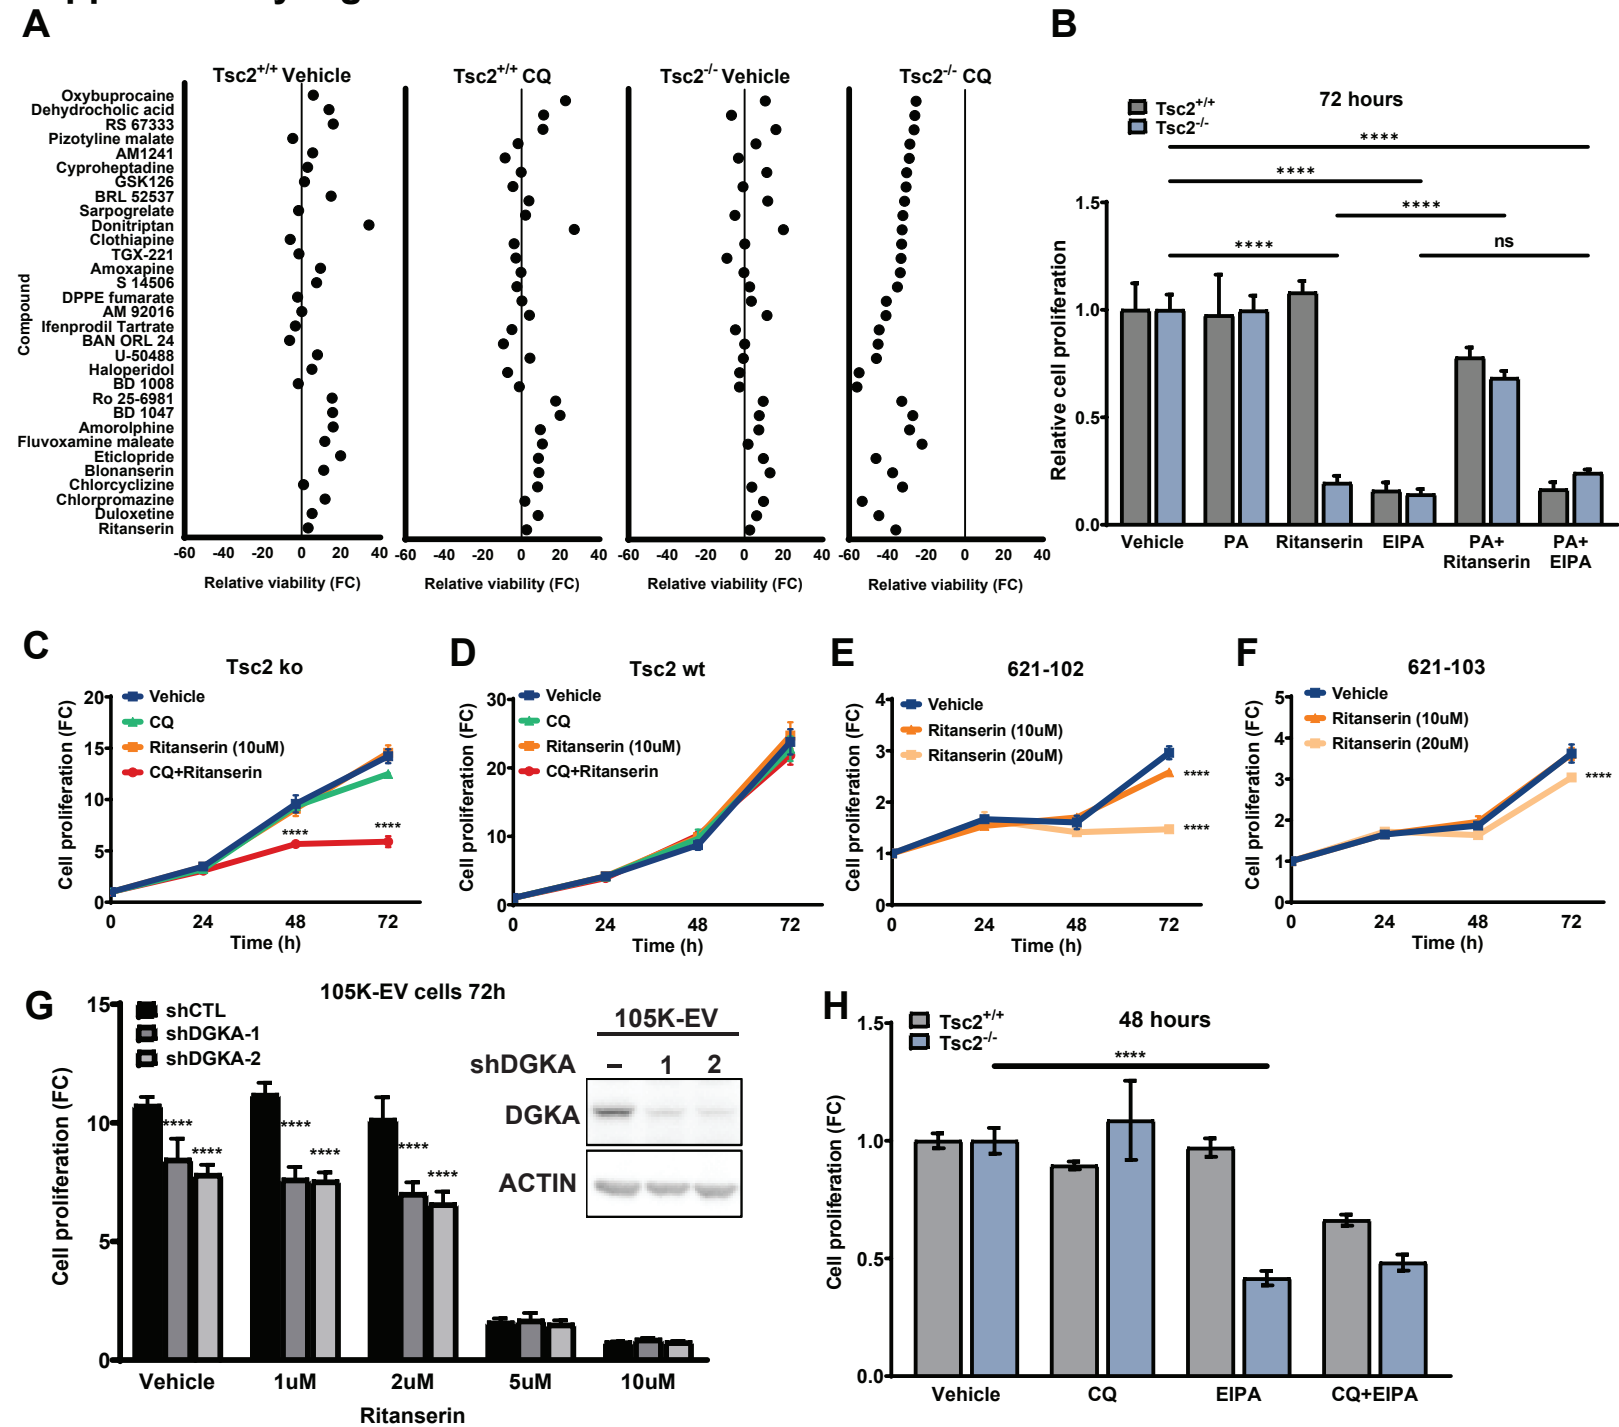

**Supplementary Figure 1. Ritanserin selectively inhibits proliferation of TSC2-deficient cells by depletion of phosphatidic acid.** (A) Identified compounds that selectively inhibit the viability of *Tsc2*<sup>-/-</sup> MEFs upon CQ treatment. Viability is represented as fold change (FC) relative to untreated cells. (B) Supplementation with PA (100uM) rescues the proliferation of *Tsc2*<sup>-/-</sup> MEFs treated with ritanserin (20uM; 72 hours) but not EIPA treated cells (6uM; 72 hours). (C, D) CQ (5uM) and ritanserin (10uM) inhibit the proliferation *Tsc2*-deficient embryonic fibroblasts (MEFs) derived from *Tsc2*<sup>fl/fl</sup> Rosa26-CreERT2 mice (*Tsc2*ko) compared to *Tsc2*-expressing MEFs (*Tsc2*wt). (E, F) Ritanserin inhibits the proliferation of TSC2-deficient human kidney-derived angiomyolipoma cells in a dose-dependent manner. (G) Ritanserin (1-10uM; 72 hours) did not impact the proliferation of shDGKA *Tsc2*-deficient 105K cells compared to shCtl cells. Immunoblotting confirming DGKA knockdown in 105K cells. (H) Macropinocytosis inhibitor EIPA (6uM; 48 hours) selectively inhibits the proliferation of *Tsc2*<sup>-/-</sup> MEFs. Data represented as mean  $\pm$  standard deviation of six biological replicates. Proliferation was quantified using crystal violet staining. Values are shown as fold-change (FC) normalized to the day of seeding. Statistical significance was assessed using two-way and one-way ANOVAs with Bonferroni correction with \*\*\*\* $p < 0.0001$ .
