# Supplementary material
Source: PubMed Central journal article supplement (PMC8137542)
Supplement: NIHMS1676600-supplement-2.pdf [file NIHMS1676600-supplement-2.pdf]

## Supplementary Figure 2

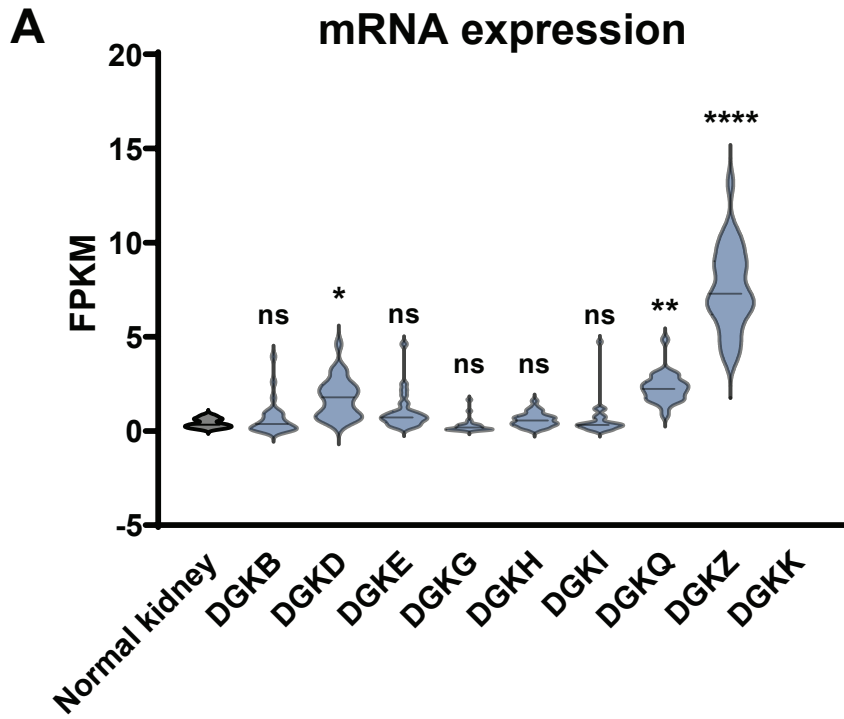

**Supplementary Figure 2. (A)** Expression of diacylglycerol kinases in renal angiomyolipoma tissues (AMLs) compared to normal kidney. DGKK is not expressed in AMLs.
