# Supplementary material
Source: PubMed Central journal article supplement (PMC8137542)
Supplement: NIHMS1676600-supplement-4.pdf [file NIHMS1676600-supplement-4.pdf]

## Supplemental Figure 4

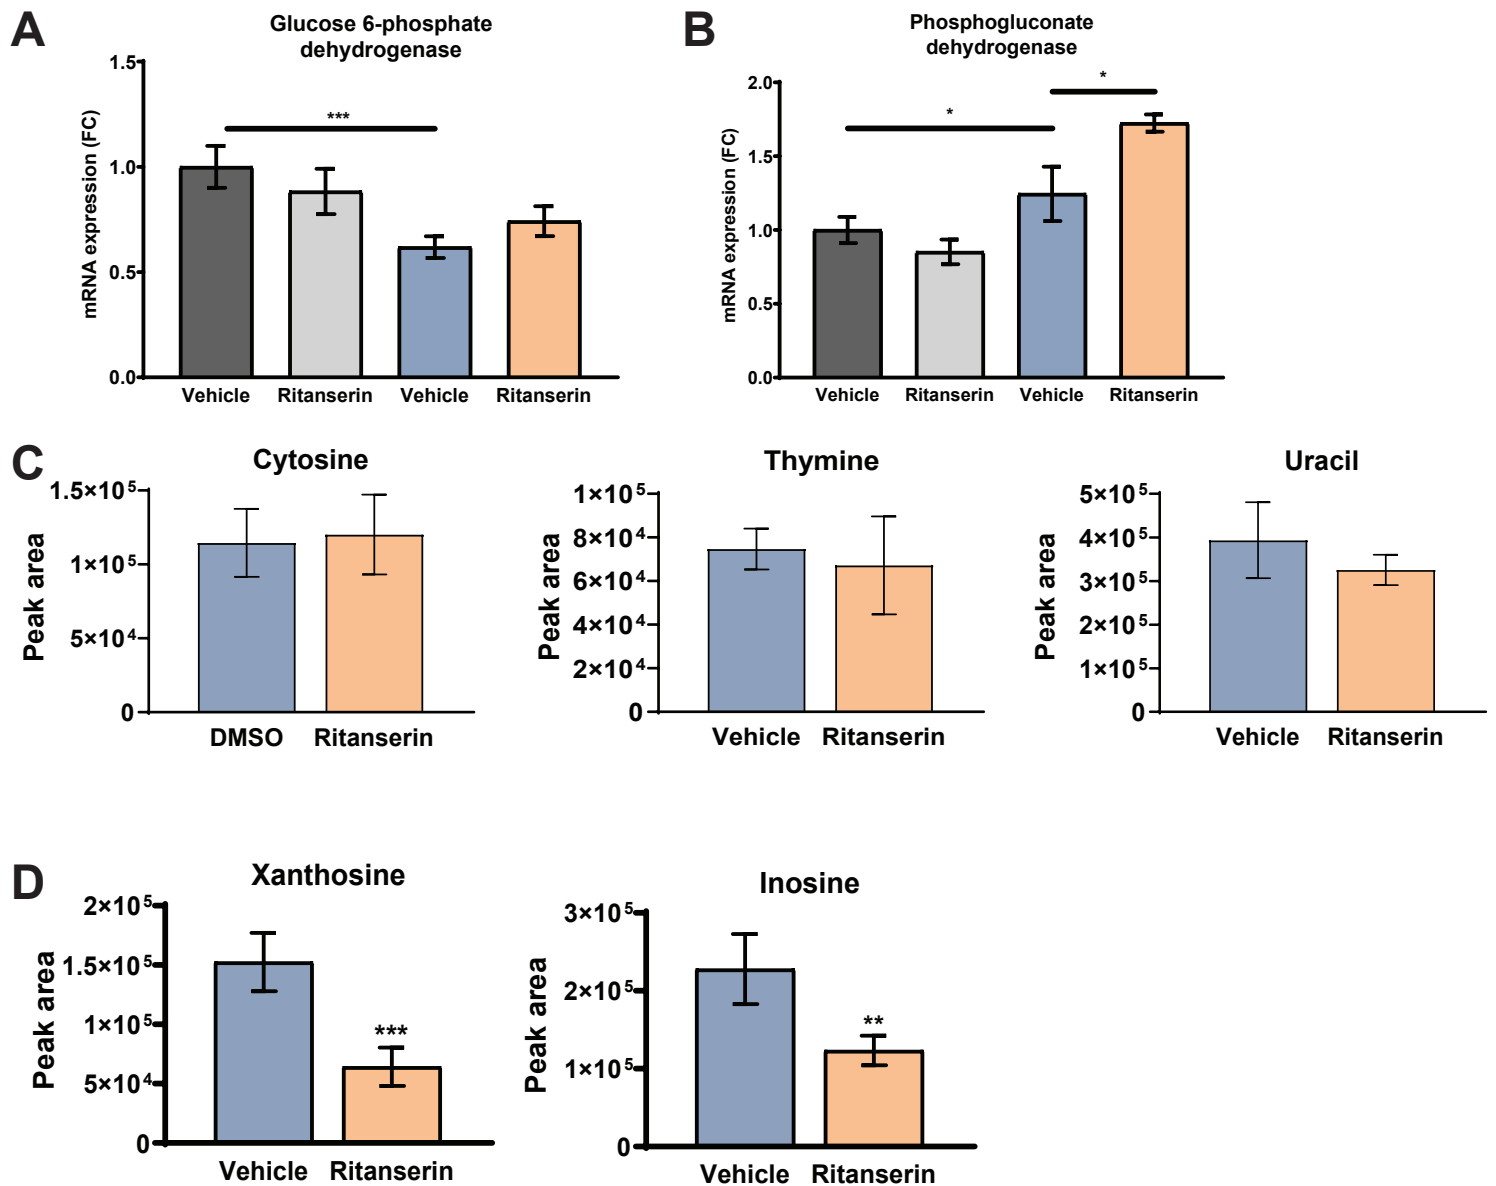

**Supplemental Figure 4.** (A, B) Expression of *PGD* but not *G6PD* is increased upon ritanserin treatment (10uM; 16 hours) in *Tsc2*<sup>-/-</sup> MEFs compared to *Tsc2*<sup>+/+</sup> MEFs. (C) Metabolomic analysis revealed that pyrimidines cytosine, thymine and uracil were not impacted, suggesting that ritanserin-induced metabolic alterations are specific to purine rather than pyrimidine synthesis. (D) Nucleosides xanthosine and inosine were decreased following ritanserin (10uM; 16 hours) treatment. Data presented as mean ± SD of four biological replicates. Statistical significance was assessed using t-test with FDR correction ( $q < 0.05$ ) and \*\* $p < 0.01$ , \*\*\* $p < 0.001$ .
