# Supplementary material
Source: PubMed Central journal article supplement (PMC8137542)
Supplement: NIHMS1676600-supplement-5.pdf [file NIHMS1676600-supplement-5.pdf]

## Supplementary Figure 5

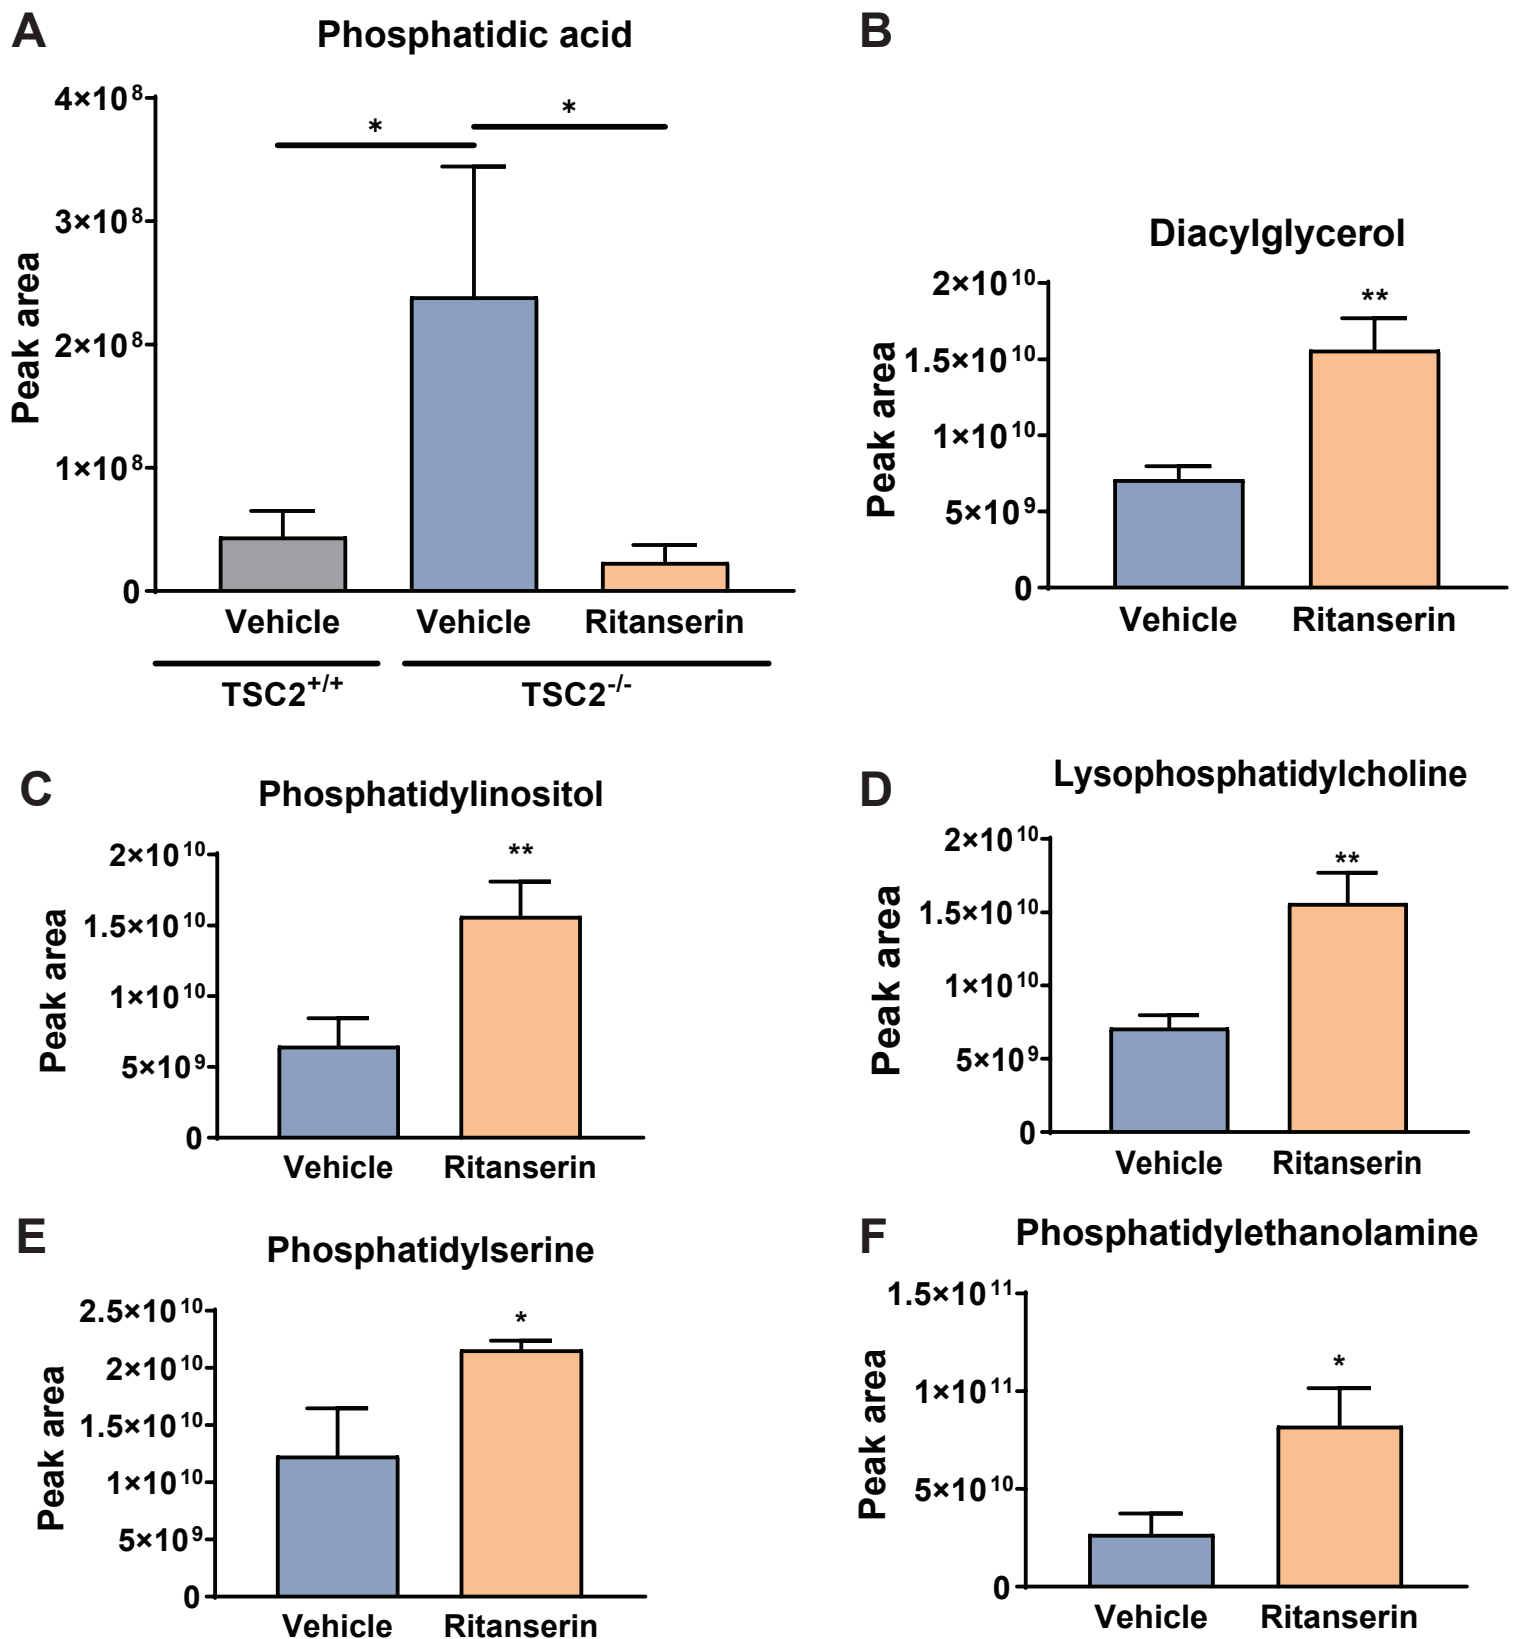

**Supplementary Figure 5.** (A) Phosphatidic acid levels are elevated in *Tsc2*<sup>-/-</sup> MEFs compared to *Tsc2*<sup>+/+</sup> MEFs. Ritanserin treatment (10uM; 16 hours) decreases PA levels. (B-F) DGKA inhibition by ritanserin leads to accumulation of diacylglycerol and phospholipids PI, PC, PS and PE. Data presented as mean ± SD of the sum of each lipid species from three biological replicates. Statistical significance was assessed using t-test with FDR correction ( $q < 0.05$ ) and \* $p < 0.05$ , \*\* $p < 0.01$ , \*\*\* $p < 0.001$ , \*\*\*\* $p < 0.0001$ .
